# Supplementary material for: Perturbed Inflammatory, Proliferation, Regulatory, And Neurodegeneration Signaling Pathways Are Associated With Trait Anxiety In Cancer Survivors
Source: Research Square preprint supplement (doi:10.21203/rs.3.rs-9383360/v1), 2026-07-17
Supplement: Supplementary file 1 [file 1fed92dcf2971b602f95102e.docx]

Supplemental Table 5. Perturbed Host-Pathogen Interaction & Innate Immunity-related signaling pathways

|  |  | Cancer Survivors | | Non-Cancer Controls | |
| --- | --- | --- | --- | --- | --- |
| Pathway ID | Pathway Name | Pert | FDR | Pert | FDR |
| **Host-Pathogen Interaction & Innate Immunity** | |  |  |  |  |
| ***Common*** | | | | | |

| hsa05120 | Epithelial cell signaling in *Helicobacter pylori* infection | 7.24 | 0.007 | 13.39 | 0.002 |
| --- | --- | --- | --- | --- | --- |
| hsa05144 | Malaria | 12.62 | 0.007 | 28.69 | 0.002 |
| hsa05146 | Amoebiasis | 5.50 | 0.009 | 27.20 | 0.002 |
| hsa05132 | Salmonella infection | 5.04 | 0.011 | 31.28 | 0.002 |
| hsa05166 | HTLV-I infection | 5.30 | 0.013 | 16.08 | 0.003 |
| hsa05140 | Leishmaniasis | 4.14 | 0.015 | 23.48 | 0.002 |
| hsa05143 | African trypanosomiasis | 6.03 | 0.015 | 24.22 | 0.002 |
| hsa05142 | Chagas disease (American trypanosomiasis) | 4.33 | 0.016 | 28.15 | 0.002 |
| ***Distinct to Non-Cancer Controls*** | | | | | |
| hsa05134 | Legionellosis |  |  | 30.72 | 0.002 |
| hsa05133 | Pertussis |  |  | 27.95 | 0.002 |
| hsa05164 | Influenza A |  |  | 24.59 | 0.002 |
| hsa05020 | Prion diseases |  |  | 21.56 | 0.002 |
| hsa05162 | Measles |  |  | 20.84 | 0.002 |
| hsa05168 | Herpes simplex infection |  |  | 20.66 | 0.002 |
| hsa05161 | Hepatitis B |  |  | 19.88 | 0.002 |
| hsa05152 | Tuberculosis |  |  | 19.17 | 0.002 |
| hsa05160 | Hepatitis C |  |  | 12.25 | 0.002 |
| hsa05131 | Shigellosis |  |  | 9.88 | 0.003 |
| hsa05130 | Pathogenic Escherichia coli infection |  |  | 7.72 | 0.003 |
| hsa05150 | Staphylococcus aureus infection |  |  | 5.50 | 0.007 |
| hsa05145 | Toxoplasmosis |  |  | 3.77 | 0.017 |
| hsa05310 | Asthma |  |  | 6.59 | 0.008 |
| hsa05332 | Graft-versus-host disease |  |  | 25.05 | 0.002 |

Abbreviations: FDR, False discovery rate. Pert, Total Normalized Perturbation Score
