# Supplementary material for: Perturbed Inflammatory, Proliferation, Regulatory, And Neurodegeneration Signaling Pathways Are Associated With Trait Anxiety In Cancer Survivors
Source: Research Square preprint supplement (doi:10.21203/rs.3.rs-9383360/v1), 2026-07-17
Supplement: Supplementary file 2 [file 6e506b050a989120ede34fa2.xlsx]

## Sheet: pe.de.All-cancer0
pathId	pathNames	totalAcc	totalPert	totalAccNorm	totalPertNorm	pPert	pAcc	pComb	pPert.fdr	pAcc.fdr	pComb.fdr
path:hsa04060	Cytokine-cytokine receptor interaction	103.609	223.585	35.5388	36.7247	0.00049975	0.00049975	4.04665e-06	0.00198549	0.00587206	5.18707e-05
path:hsa05323	Rheumatoid arthritis	0.820015	92.8986	1.63322	32.5789	0.00049975	0.0469765	0.000273725	0.00198549	0.122661	0.00113515
path:hsa05132	Salmonella infection	2.93519	99.1684	2.16476	31.2824	0.00049975	0.0364818	0.000217183	0.00198549	0.107165	0.000956963
path:hsa04621	NOD-like receptor signaling pathway	0.239218	90.6574	-0.634687	30.744	0.00049975	0.418291	0.00198024	0.00198549	0.641076	0.00498596
path:hsa05134	Legionellosis	1.33904	91.0053	0.861322	30.7229	0.00049975	0.223888	0.00112985	0.00198549	0.404721	0.00338954
path:hsa04062	Chemokine signaling pathway	144.234	187.026	29.0947	30.4464	0.00049975	0.00049975	4.04665e-06	0.00198549	0.00587206	5.18707e-05
path:hsa04064	NF-kappa B signaling pathway	231.197	324.557	27.062	29.4823	0.00049975	0.00049975	4.04665e-06	0.00198549	0.00587206	5.18707e-05
path:hsa05144	Malaria	0.313883	85.7886	0.557559	28.6866	0.00049975	0.418291	0.00198024	0.00198549	0.641076	0.00498596
path:hsa05142	Chagas disease (American trypanosomiasis)	18.1546	112.012	7.64667	28.1462	0.00049975	0.001999	1.48017e-05	0.00198549	0.014093	0.000149074
path:hsa05133	Pertussis	60.2308	139.684	24.2321	27.9506	0.00049975	0.00049975	4.04665e-06	0.00198549	0.00587206	5.18707e-05
path:hsa04380	Osteoclast differentiation	251.899	337.689	25.6235	27.5111	0.00049975	0.00049975	4.04665e-06	0.00198549	0.00587206	5.18707e-05
path:hsa04620	Toll-like receptor signaling pathway	3.64537	94.2293	0.796702	27.2638	0.00049975	0.327836	0.00159194	0.00198549	0.543822	0.00440124
path:hsa05146	Amoebiasis	116.066	197.352	24.6935	27.202	0.00049975	0.00049975	4.04665e-06	0.00198549	0.00587206	5.18707e-05
path:hsa04010	MAPK signaling pathway	199.088	281.197	25.4916	25.796	0.00049975	0.00049975	4.04665e-06	0.00198549	0.00587206	5.18707e-05
path:hsa04623	Cytosolic DNA-sensing pathway	0.304649	59.4994	-0.221041	25.7569	0.00049975	0.797601	0.00351867	0.00198549	0.892554	0.00763281
path:hsa04210	Apoptosis	160.604	226.28	25.0807	25.0952	0.00049975	0.00049975	4.04665e-06	0.00198549	0.00587206	5.18707e-05
path:hsa05332	Graft-versus-host disease	0.193936	64.6405	0.539117	25.0456	0.00049975	0.365817	0.00175633	0.00198549	0.592876	0.0046725
path:hsa04940	Type I diabetes mellitus	0.193936	64.4308	0.464511	24.9566	0.00049975	0.473263	0.00221128	0.00198549	0.702422	0.00547002
path:hsa05164	Influenza A	1.73288	87.6644	-0.309264	24.5866	0.00049975	0.737131	0.00328095	0.00198549	0.879048	0.00722834
path:hsa05143	African trypanosomiasis	6.31121	70.5275	6.7155	24.2241	0.00049975	0.00349825	2.49246e-05	0.00198549	0.0197301	0.000211373
path:hsa05140	Leishmaniasis	3.35523	74.7824	3.06242	23.478	0.00049975	0.0184908	0.000116359	0.00198549	0.0704648	0.000585948
path:hsa05020	Prion diseases	20.7378	100.125	11.1336	21.5621	0.00049975	0.0009995	7.74708e-06	0.00198549	0.0108407	8.4026e-05
path:hsa05162	Measles	3.19496	65.6414	0.940963	20.836	0.00049975	0.255372	0.00127194	0.00198549	0.455791	0.00373632
path:hsa05168	Herpes simplex infection	3.50742	77.9196	1.28407	20.6644	0.00049975	0.0834583	0.000462328	0.00198549	0.175636	0.00171548
path:hsa05010	Alzheimer's disease	1.31678	68.5575	0.367261	19.8874	0.00049975	0.665167	0.00299479	0.00198549	0.860446	0.00671605
path:hsa05161	Hepatitis B	222.741	295.223	18.5587	19.8784	0.00049975	0.00049975	4.04665e-06	0.00198549	0.00587206	5.18707e-05
path:hsa05152	Tuberculosis	31.5317	100.449	7.54972	19.1686	0.00049975	0.003998	2.82185e-05	0.00198549	0.0216815	0.000211373
path:hsa05203	Viral carcinogenesis	0.133923	63.1305	-0.104591	16.1674	0.00049975	0.875062	0.00381987	0.00198549	0.927698	0.00800066
path:hsa05202	Transcriptional misregulation in cancer	0.00126851	25.9404	-0.856399	14.4395	0.00049975	0.132434	0.000703075	0.00198549	0.260328	0.00247834
path:hsa05120	Epithelial cell signaling in Helicobacter pylori infection	16.9848	35.5797	12.2902	13.3883	0.00049975	0.00049975	4.04665e-06	0.00198549	0.00587206	5.18707e-05
path:hsa04622	RIG-I-like receptor signaling pathway	0.60959	21.2783	-0.690782	12.5272	0.00049975	0.396302	0.00188684	0.00198549	0.627849	0.00492674
path:hsa05160	Hepatitis C	7.37048	30.6897	5.09798	12.2477	0.00049975	0.00349825	2.49246e-05	0.00198549	0.0197301	0.000211373
path:hsa04512	ECM-receptor interaction	2.83849	20.6382	5.0789	12.1252	0.00049975	0.0049975	3.47158e-05	0.00198549	0.025166	0.000222497
path:hsa05322	Systemic lupus erythematosus	2.4581	21.0071	3.64689	11.0857	0.00049975	0.0144928	9.29645e-05	0.00198549	0.0583851	0.000485481
path:hsa05219	Bladder cancer	1.75166	16.6914	0.876776	10.1457	0.00049975	0.18041	0.000929902	0.00198549	0.330361	0.00301716
path:hsa04115	p53 signaling pathway	11.1663	25.0372	7.82299	8.51675	0.00049975	0.00049975	4.04665e-06	0.00198549	0.00587206	5.18707e-05
path:hsa04350	TGF-beta signaling pathway	3.30907	14.3587	2.60959	7.74524	0.00049975	0.025987	0.000159111	0.00198549	0.0872421	0.000747822
path:hsa05166	HTLV-I infection	35.3631	110.035	7.61566	16.0839	0.0009995	0.001999	2.82185e-05	0.0034169	0.014093	0.000211373
path:hsa05131	Shigellosis	0.801405	15.6288	-0.188335	9.88474	0.0009995	0.82059	0.00664837	0.0034169	0.903931	0.0132031
path:hsa05200	Pathways in cancer	16.745	54.7217	3.29954	8.43176	0.0009995	0.0149925	0.000181445	0.0034169	0.0587206	0.000825284
path:hsa04110	Cell cycle	33.4128	60.8843	5.97855	8.34558	0.0009995	0.00349825	4.74257e-05	0.0034169	0.0197301	0.000278626
path:hsa05130	Pathogenic Escherichia coli infection	17.4814	24.8645	7.86024	7.71896	0.0009995	0.00049975	7.74708e-06	0.0034169	0.00587206	8.4026e-05
path:hsa05034	Alcoholism	4.78111	28.6605	1.22092	7.40842	0.0009995	0.075962	0.000796123	0.0034169	0.167354	0.00273789
path:hsa04012	ErbB signaling pathway	60.5863	79.2433	12.7425	13.1079	0.00149925	0.00149925	3.14811e-05	0.00468914	0.0132121	0.000211373
path:hsa05030	Cocaine addiction	20.7466	34.3584	10.4469	10.4632	0.00149925	0.00149925	3.14811e-05	0.00468914	0.0132121	0.000211373
path:hsa05031	Amphetamine addiction	12.3971	27.2959	9.14427	10.2278	0.00149925	0.001999	4.11126e-05	0.00468914	0.014093	0.000252038
path:hsa04920	Adipocytokine signaling pathway	26.4507	35.555	9.41336	9.63106	0.00149925	0.00149925	3.14811e-05	0.00468914	0.0132121	0.000211373
path:hsa05330	Allograft rejection	0.233677	7.85587	0.475041	7.18404	0.001999	0.498751	0.00788705	0.00576182	0.725714	0.0148276
path:hsa04145	Phagosome	0	13.1341	NA	6.19339	0.001999	NA	NA	0.00576182	NA	NA
path:hsa04912	GnRH signaling pathway	18.0555	24.182	5.71058	5.94933	0.001999	0.001999	5.36672e-05	0.00576182	0.014093	0.000302683
path:hsa04390	Hippo signaling pathway	5.90966	18.3673	2.11405	5.53386	0.001999	0.03998	0.000833925	0.00576182	0.110533	0.0027996
path:hsa04612	Antigen processing and presentation	6.52941	16.4899	8.84771	8.64732	0.00249875	0.00249875	8.10685e-05	0.00655922	0.0167773	0.000439641
path:hsa05410	Hypertrophic cardiomyopathy (HCM)	0	8.52352	NA	7.53462	0.00249875	NA	NA	0.00655922	NA	NA
path:hsa04672	Intestinal immune network for IgA production	0.410224	10.3294	0.657998	6.90068	0.00249875	0.33933	0.0068449	0.00655922	0.556344	0.0134046
path:hsa05414	Dilated cardiomyopathy	0.899708	9.99902	1.72013	6.68092	0.00249875	0.0394803	0.0010086	0.00655922	0.110533	0.00309159
path:hsa05150	Staphylococcus aureus infection	4.24014	10.2654	3.69534	5.50254	0.00249875	0.0144928	0.000406538	0.00655922	0.0583851	0.00154924
path:hsa04950	Maturity onset diabetes of the young	1.80589	9.62637	2.29674	6.92237	0.0029985	0.0304848	0.000941524	0.00759965	0.0949743	0.00301716
path:hsa04144	Endocytosis	0	12.2646	NA	3.88232	0.0029985	NA	NA	0.00759965	NA	NA
path:hsa04150	mTOR signaling pathway	11.4377	20.1193	6.7815	7.19064	0.00349825	0.00349825	0.000150659	0.00829424	0.0197301	0.000732514
path:hsa05310	Asthma	0.0397406	6.23974	0.0458868	6.58731	0.00349825	0.956022	0.0224091	0.00829424	0.983935	0.0371727
path:hsa04510	Focal adhesion	17.3355	31.9332	4.1418	5.67117	0.00349825	0.0089955	0.000357688	0.00829424	0.0422789	0.00140094
path:hsa04080	Neuroactive ligand-receptor interaction	0.194011	7.11417	1.19273	4.40538	0.00349825	0.07996	0.00256831	0.00829424	0.170824	0.00603554
path:hsa05014	Amyotrophic lateral sclerosis (ALS)	26.1886	32.1987	6.36905	6.3062	0.00449775	0.00449775	0.00023888	0.0100177	0.0234883	0.00102067
path:hsa04610	Complement and coagulation cascades	6.80506	12.3708	3.28289	4.44905	0.00449775	0.0124938	0.000606146	0.0100177	0.0568264	0.00219145
path:hsa04151	PI3K-Akt signaling pathway	11.5182	32.6696	1.60418	4.0382	0.00449775	0.0554723	0.00231937	0.0100177	0.131534	0.00560722
path:hsa04630	Jak-STAT signaling pathway	1.33097	9.19035	0.533338	4.00575	0.00449775	0.55972	0.0175833	0.0100177	0.758851	0.0302348
path:hsa04930	Type II diabetes mellitus	4.15539	11.5685	3.11989	5.38139	0.0049975	0.0194903	0.000997077	0.0106469	0.0723191	0.00309159
path:hsa04914	Progesterone-mediated oocyte maturation	2.99019	16.7636	0.948047	4.78349	0.0049975	0.132934	0.00552509	0.0106469	0.260328	0.0112904
path:hsa04360	Axon guidance	8.28949	13.7851	4.18457	4.27292	0.0049975	0.00549725	0.000315998	0.0106469	0.026728	0.00127302
path:hsa04723	Retrograde endocannabinoid signaling	1.35726	5.70834	2.70482	3.82998	0.005997	0.0249875	0.00146941	0.0125937	0.0872421	0.00419951
path:hsa04660	T cell receptor signaling pathway	1.73648	14.0234	0.119124	4.63655	0.00649675	0.868066	0.0348412	0.013451	0.927252	0.0539847
path:hsa05145	Toxoplasmosis	1.23721	12.2783	-0.635633	3.77192	0.00849575	0.448276	0.0250235	0.0173455	0.679644	0.0405598
path:hsa04721	Synaptic vesicle cycle	0	4.76181	NA	4.24238	0.0089955	NA	NA	0.0181142	NA	NA
path:hsa05210	Colorectal cancer	2.33632	10.123	2.17699	4.37971	0.009995	0.0324838	0.00293269	0.0195902	0.0974513	0.00671605
path:hsa04650	Natural killer cell mediated cytotoxicity	8.73835	19.5579	1.91749	4.02961	0.009995	0.0424788	0.00372116	0.0195902	0.115183	0.00794974
path:hsa04066	HIF-1 signaling pathway	7.9666	14.0129	3.50662	4.01686	0.0104948	0.0144928	0.00148919	0.0202991	0.0583851	0.00419951
path:hsa04114	Oocyte meiosis	11.672	24.8801	2.10929	3.88025	0.0114943	0.0384808	0.00385847	0.021388	0.110533	0.00800066
path:hsa05222	Small cell lung cancer	6.08083	13.7213	2.28829	3.7936	0.0114943	0.0289855	0.00300079	0.021388	0.0928854	0.00671605
path:hsa04310	Wnt signaling pathway	3.57667	9.31489	2.83811	3.47358	0.0114943	0.021989	0.00234628	0.021388	0.0794987	0.00560722
path:hsa04960	Aldosterone-regulated sodium reabsorption	2.74039	6.03902	3.56563	3.4619	0.0129935	0.0129935	0.0016354	0.0238756	0.0572526	0.00443445
path:hsa04141	Protein processing in endoplasmic reticulum	4.57152	23.0545	0.969672	3.10914	0.0164918	0.125937	0.0149058	0.0299295	0.253673	0.026604
path:hsa05169	Epstein-Barr virus infection	3.39046	15.1921	0.8749	2.91082	0.0174913	0.286857	0.0315842	0.0313563	0.489857	0.0494819
path:hsa04540	Gap junction	3.91108	12.9097	0.684798	2.93669	0.017991	0.31934	0.0353872	0.0318636	0.536036	0.0542347
path:hsa04726	Serotonergic synapse	2.75301	9.0035	0.91051	2.74363	0.0189905	0.175912	0.0223877	0.0332334	0.326363	0.0371727
path:hsa04713	Circadian entrainment	2.96621	8.33932	1.10678	2.59519	0.023988	0.091954	0.0156979	0.0414851	0.190669	0.0276076
path:hsa04742	Taste transduction	1.96942	3.75894	2.40166	2.47309	0.0264868	0.025987	0.00570009	0.0445732	0.0872421	0.0114816
path:hsa04664	Fc epsilon RI signaling pathway	1.49111	8.40161	-0.29333	2.66082	0.0269865	0.721139	0.0961247	0.0445732	0.878099	0.136905
path:hsa05032	Morphine addiction	1.81142	4.92482	1.83362	2.58556	0.0269865	0.0529735	0.0107938	0.0445732	0.13104	0.0200253
path:hsa05100	Bacterial invasion of epithelial cells	1.87241	7.1878	0.441484	2.54196	0.0269865	0.597701	0.0826992	0.0445732	0.780332	0.118986
path:hsa04810	Regulation of actin cytoskeleton	9.58585	16.4633	2.40855	2.46358	0.027986	0.0309845	0.00698069	0.0457105	0.0949743	0.0134833
path:hsa04724	Glutamatergic synapse	1.82374	6.35398	1.58256	2.36113	0.0284858	0.057971	0.0122302	0.0460155	0.132974	0.0221084
path:hsa03320	PPAR signaling pathway	0.29852	4.49307	0.25915	2.38339	0.029985	0.756622	0.10858	0.0473957	0.881096	0.153098
path:hsa05412	Arrhythmogenic right ventricular cardiomyopathy (ARVC)	0.0559529	3.419	-0.375586	2.20987	0.029985	0.524238	0.0809994	0.0473957	0.746642	0.117741
path:hsa04727	GABAergic synapse	1.55116	4.83641	2.52943	2.53568	0.031984	0.0289855	0.00740127	0.049491	0.0928854	0.0141024
path:hsa05211	Renal cell carcinoma	1.63397	6.06986	0.816295	2.26543	0.031984	0.288356	0.0524414	0.049491	0.489857	0.0786621
path:hsa04740	Olfactory transduction	1.74214	3.55121	1.82902	2.17649	0.0349825	0.0469765	0.0121789	0.053567	0.122661	0.0221084
path:hsa05416	Viral myocarditis	0.862188	4.91406	0.171332	2.20142	0.0364818	0.835082	0.136825	0.0552868	0.906827	0.18914
path:hsa05215	Prostate cancer	8.00967	13.2812	1.70138	1.94583	0.0409795	0.0544728	0.0158597	0.0614693	0.131534	0.0276076
path:hsa04976	Bile secretion	0.135082	2.88286	0.142396	1.94217	0.043978	0.836082	0.158221	0.0646477	0.906827	0.214512
path:hsa04662	B cell receptor signaling pathway	1.51927	6.39695	0.134749	1.77083	0.043978	0.866067	0.162554	0.0646477	0.927252	0.218287
path:hsa04910	Insulin signaling pathway	9.64805	15.326	1.453	1.679	0.0469765	0.0584708	0.0189453	0.0683718	0.132974	0.0321841
path:hsa04020	Calcium signaling pathway	1.5049	7.97788	0.264774	1.74087	0.0584708	0.763618	0.18346	0.0834486	0.881096	0.244037
path:hsa04122	Sulfur relay system	0.894088	2.0674	1.24973	1.40768	0.0584708	0.071964	0.0272278	0.0834486	0.161062	0.0436264
path:hsa05012	Parkinson's disease	2.45412	8.71499	1.75155	1.55455	0.0754623	0.0504748	0.0250263	0.106663	0.129399	0.0405598
path:hsa04970	Salivary secretion	1.09328	3.75761	1.64112	1.53774	0.0784608	0.055972	0.0282295	0.109502	0.131534	0.0447232
path:hsa05223	Non-small cell lung cancer	4.98535	7.11005	1.2044	1.22555	0.0789605	0.0774613	0.0372903	0.109502	0.168031	0.0565369
path:hsa04725	Cholinergic synapse	2.3509	6.60311	0.514721	1.40622	0.0824588	0.558721	0.187859	0.113284	0.758851	0.247553
path:hsa04961	Endocrine and other factor-regulated calcium reabsorption	0.894684	3.04449	0.99119	1.27991	0.093953	0.13993	0.0700934	0.127381	0.266623	0.10295
path:hsa04320	Dorso-ventral axis formation	0.0238404	1.75491	-0.423472	1.18604	0.0944528	0.581209	0.214224	0.127381	0.773118	0.277115
path:hsa04728	Dopaminergic synapse	2.86244	8.14797	0.921653	1.48605	0.0974513	0.268366	0.121448	0.13023	0.467155	0.169546
path:hsa03460	Fanconi anemia pathway	0.365402	3.06554	0.324474	1.3185	0.09995	0.675162	0.249408	0.132366	0.865435	0.313986
path:hsa04370	VEGF signaling pathway	2.63499	5.97696	0.293257	1.12236	0.11994	0.728636	0.300398	0.157421	0.878099	0.374833
path:hsa05320	Autoimmune thyroid disease	0.233677	1.63622	0.564645	1.14294	0.146427	0.411794	0.229641	0.190484	0.641076	0.294359
path:hsa05212	Pancreatic cancer	2.98154	5.37133	1.60257	1.05756	0.17941	0.0529735	0.053755	0.231345	0.13104	0.0797837
path:hsa04140	Regulation of autophagy	0.777423	2.14785	0.538212	0.915334	0.196402	0.46027	0.307672	0.251053	0.690405	0.380542
path:hsa03018	RNA degradation	0.101842	4.93196	-0.303858	1.05524	0.202399	0.694653	0.416428	0.256488	0.875147	0.503032
path:hsa05217	Basal cell carcinoma	1.86036	2.84152	0.8997	0.855216	0.205897	0.153423	0.140729	0.258691	0.288436	0.192648
path:hsa04530	Tight junction	1.47076	5.80128	0.520917	1.00731	0.257371	0.548226	0.41741	0.320624	0.758851	0.503032
path:hsa03013	RNA transport	0.128928	5.38464	-0.439228	-1.02769	0.290355	0.58071	0.468767	0.358674	0.773118	0.560137
path:hsa05213	Endometrial cancer	2.51951	4.56287	0.643568	0.747678	0.306847	0.382809	0.369027	0.375887	0.613364	0.452459
path:hsa04744	Phototransduction	0.503871	1.61713	-0.00652401	0.708598	0.362819	0.994003	0.728451	0.44078	0.994003	0.82496
path:hsa04972	Pancreatic secretion	0.057861	2.60096	-0.229199	0.790946	0.373313	0.723638	0.623708	0.449812	0.878099	0.7268
path:hsa03015	mRNA surveillance pathway	4.00748e-05	3.0615	-0.654443	-0.686534	0.462769	0.135432	0.236268	0.553065	0.261588	0.300125
path:hsa05216	Thyroid cancer	0.987535	2.50883	0.222331	0.544341	0.483258	0.785607	0.747344	0.572895	0.892554	0.836314
path:hsa04722	Neurotrophin signaling pathway	2.39785	7.67028	-0.544292	0.558334	0.491254	0.49925	0.589956	0.577715	0.725714	0.693198
path:hsa04962	Vasopressin-regulated water reabsorption	0.682531	2.02603	0.95089	0.536774	0.498251	0.102449	0.202907	0.581293	0.209352	0.264906
path:hsa05214	Glioma	2.78046	4.94428	0.499114	0.553476	0.510245	0.552224	0.638677	0.590598	0.758851	0.732142
path:hsa04330	Notch signaling pathway	0.587911	2.65383	-0.306151	0.547849	0.534233	0.748126	0.766217	0.613533	0.879048	0.850682
path:hsa03008	Ribosome biogenesis in eukaryotes	0	2.3723	NA	-0.550126	0.551724	NA	NA	0.625003	NA	NA
path:hsa04720	Long-term potentiation	3.68991	5.27771	0.556957	0.495864	0.552724	0.507246	0.636897	0.625003	0.729814	0.732142
path:hsa04978	Mineral absorption	0.0203038	1.6273	-0.263515	0.439802	0.601199	0.716142	0.793366	0.674628	0.878099	0.873942
path:hsa04710	Circadian rhythm	0.411699	1.97082	-0.435351	0.425138	0.610195	0.595702	0.731348	0.679535	0.780332	0.82496
path:hsa04666	Fc gamma R-mediated phagocytosis	2.42009	5.39285	0.190068	0.405636	0.621189	0.813593	0.850284	0.686578	0.903281	0.915192
path:hsa04670	Leukocyte transendothelial migration	1.61048	5.39183	-0.335587	0.379628	0.676662	0.711644	0.833435	0.742308	0.878099	0.903956
path:hsa04340	Hedgehog signaling pathway	0.731339	1.64954	0.225358	0.288051	0.717141	0.768616	0.87953	0.780887	0.881096	0.939498
path:hsa04973	Carbohydrate digestion and absorption	0.324945	1.25298	0.681789	0.317858	0.723638	0.262869	0.505907	0.782168	0.463306	0.599436
path:hsa05110	Vibrio cholerae infection	0.266047	2.44946	-0.0833171	0.300218	0.737631	0.930535	0.944685	0.791473	0.964746	0.979417
path:hsa04130	SNARE interactions in vesicular transport	0.266167	1.17658	-0.215496	-0.254474	0.756622	0.794103	0.906922	0.805967	0.892554	0.956056
path:hsa04260	Cardiac muscle contraction	0	2.15417	NA	0.223705	0.805597	NA	NA	0.846927	NA	NA
path:hsa04971	Gastric acid secretion	0.461691	2.1869	-0.118314	0.212822	0.806597	0.898551	0.958073	0.846927	0.94549	0.986046
path:hsa05220	Chronic myeloid leukemia	2.16659	4.5868	0.032523	0.177071	0.834083	0.969515	0.9804	0.869576	0.990592	0.995482
path:hsa04270	Vascular smooth muscle contraction	1.69845	5.41223	-0.496707	0.156444	0.85957	0.54023	0.820573	0.883614	0.758851	0.896905
path:hsa05221	Acute myeloid leukemia	0.658265	2.25781	-0.26091	-0.15471	0.85957	0.744128	0.925459	0.883614	0.879048	0.96659
path:hsa05218	Melanoma	1.86714	3.74561	-0.363139	-0.158423	0.869065	0.695152	0.908592	0.887171	0.875147	0.956056
path:hsa05016	Huntington's disease	0.331422	6.91552	-0.0108412	0.142075	0.877061	0.993503	0.991347	0.889159	0.994003	0.995482
path:hsa04730	Long-term depression	1.26386	2.97829	0.013197	0.0916477	0.916542	0.989005	0.995482	0.922819	0.994003	0.995482
path:hsa04916	Melanogenesis	2.91176	5.22526	-0.0920025	0.0657667	0.949525	0.915542	0.991064	0.949525	0.956233	0.995482
path:hsa04514	Cell adhesion molecules (CAMs)	NA	NA	NA	NA	NA	NA	NA	NA	NA	NA
path:hsa04520	Adherens junction	NA	NA	NA	NA	NA	NA	NA	NA	NA	NA
