# Supplementary material for: Perturbed Inflammatory, Proliferation, Regulatory, And Neurodegeneration Signaling Pathways Are Associated With Trait Anxiety In Cancer Survivors
Source: Research Square preprint supplement (doi:10.21203/rs.3.rs-9383360/v1), 2026-07-17
Supplement: Supplementary file 3 [file a7f047c5e2a854d8d420b31b.docx]

Supplementary Table 2. Sociodemographic characteristics of cancer survivors and non-cancer controls before and after propensity score matching (PSM).

| Characteristics | Cancer survivors (*n*=74) | Unfiltered  Non-cancer Cohort (*n*=1019) | *p#* | 1:3 PSM  Non-cancer Cohort (*n*=222) | *p#* |
| --- | --- | --- | --- | --- | --- |
| Age in years, median (IQR) | 68.5 (10) | 59 (16) | <0.001 | 69 (11) | 0.908 |
| Race/Ethnicity, n (%) |  |  |  |  |  |
| White/Caucasian | 52 (70%) | 357 (35%) | Ref | 149 (67%) | Ref |
| Chinese American | 1 (1%) | 102 (10%) | 0.008 | 3 (1%) | 0.969 |
| Black/African American | 12 (16%) | 289 (28%) | <0.001 | 40 (18%) | 0.680 |
| Hispanic | 9 (12%) | 271 (27%) | <0.001 | 30 (14%) | 0.714 |
| Gender, n (%) |  |  |  |  |  |
| Female | 36 (49%) | 548 (54%) | Ref | 114 (51%) | Ref |
| Male | 38 (51%) | 471 (46%) | 0.394 | 108 (49%) | 0.687 |
| Employment, n (%) |  |  |  |  |  |
| Not working | 36 (49%) | 380 (37%) | Ref | 108 (49%) | Ref |
| Working for pay | 38 (51%) | 639 (63%) | 0.054 | 114 (51%) | 1.00 |
| Household income, n (%) |  |  |  |  |  |
| <$29,999 | 24 (32%) | 341 (33%) | Ref | 72 (32%) | Ref |
| $30,000 - 74,999 | 29 (39%) | 466 (46%) | 0.666 | 90 (41%) | 0.915 |
| $75,000 - $100,000 | 4 (5%) | 94 (9%) | 0.362 | 15 (7%) | 0.715 |
| >$100,000 | 17 (23%) | 118 (12%) | 0.032 | 45 (20%) | 0.735 |
| BMI, n (%) |  |  |  |  |  |
| Normal | 22 (30%) | 248 (24%) | Ref | 66 (30%) | Ref |
| Grade 1 Overweight | 36 (49%) | 391 (38%) | 0.895 | 101 (45%) | 0.831 |
| Grade 2 Overweight | 15 (20%) | 336 (33%) | 0.047 | 52 (23%) | 0.706 |
| Grade 3 Overweight | 1 (1%) | 44 (4%) | 0.188 | 3 (1%) | 1.00 |
| Education, n (%) |  |  |  |  |  |
| High school or less | 5 (7%) | 157 (15%) | Ref | 16 (7%) | Ref |
| Some college, technical, or associate's degree | 30 (41%) | 452 (44%) | 0.135 | 95 (43%) | 0.985 |
| Bachelor's degree or more | 39 (53%) | 410 (40%) | 0.024 | 111 (50%) | 0.830 |
| Marital status, n (%) |  |  |  |  |  |
| Married | 48 (65%) | 625 (61%) | Ref | 130 (59%) | Ref |
| Widowed, divorced, or separated | 21 (28%) | 304 (30%) | 0.696 | 73 (33%) | 0.405 |
| Never married | 5 (7%) | 90 (9%) | 0.503 | 19 (9%) | 0.523 |

IQR=Interquartile range; BMI = Body mass index

#p values obtained from univariate logistic regression analyses comparing cancer survivors to the Unfiltered or PSM matched cohort
