# Supplementary material for: Perturbed Inflammatory, Proliferation, Regulatory, And Neurodegeneration Signaling Pathways Are Associated With Trait Anxiety In Cancer Survivors
Source: Research Square preprint supplement (doi:10.21203/rs.3.rs-9383360/v1), 2026-07-17
Supplement: Supplementary file 4 [file b4e79dda89a22107a9d5de57.docx]

Supplementary Table 4. Differences in comorbidity and other treatment characteristics in the propensity-score matched cohort with low and high trait anxiety.

| Characteristic | Low Trait Anxiety  n=181 | High Trait Anxiety  n=41 | Statistic |
| --- | --- | --- | --- |
|  | % (n) | % (n) |  |
| Diabetes |  |  |  |
| Normal  IFG  Untreated diabetes  Treated diabetes | 77 (140)  15 (27)  1 (2)  7 (12) | 80 (30)  15 (6)  2 (1)  2 (1) | p=0.72, =1.487 |
| Hypertension |  |  |  |
| None  Hypertension | 74 (134)  26 (47) | 71 (29)  29 (12) | p=0.68, =0.187 |
| Tricyclic anti-depressants |  |  |  |
| No  Yes | 99 (180)  1 (1) | 100 (41)  0 (0) | p=1.00, OR = 0 |
| Tricyclic anti-depressants plus anti-psychotics combinations |  |  |  |
| No  Yes | 100 (181)  0 (0) | 100 (41)  0 (0) | p=1.00, OR = 0 |
