# Supplementary material for: Perturbed Inflammatory, Proliferation, Regulatory, And Neurodegeneration Signaling Pathways Are Associated With Trait Anxiety In Cancer Survivors
Source: Research Square preprint supplement (doi:10.21203/rs.3.rs-9383360/v1), 2026-07-17
Supplement: Supplementary file 5 [file dd2bb18680b0a21f758af50c.docx]

Supplementary Table 1. Statements that correspond to the Spielberger trait anxiety scales used in the MESA study to assess trait anxiety.

| Statement |
| --- |
| I feel nervous and restless |
| I feel satisfied with myself |
| I wish I could be as happy as others seem to be |
| I feel like a failure |
| I worry too much over something that really doesn’t matter |
| I lack self-confidence |
| I feel secure |
| I feel inadequate |
| I am a steady person |
| I get in a state of tension or turmoil as I think over my recent concerns and interests |
