# Supplementary material for: Perturbed Inflammatory, Proliferation, Regulatory, And Neurodegeneration Signaling Pathways Are Associated With Trait Anxiety In Cancer Survivors
Source: Research Square preprint supplement (doi:10.21203/rs.3.rs-9383360/v1), 2026-07-17
Supplement: Supplementary file 6 [file ddff0705f373a470c4cf11f2.docx]

Supplementary Table 3. Differences in comorbidity and other treatment characteristics in the cancer survivors with low and high trait anxiety.

| Characteristic | Low Trait Anxiety  n=63 | High Trait Anxiety  n=11 | Statistic |
| --- | --- | --- | --- |
|  | % (n) | % (n) |  |
| Diabetes |  |  |  |
| Normal  IFG  Untreated diabetes  Treated diabetes | 76 (48)  17 (11)  2 (1)  5 (3) | 73 (8)  9 (1)  18 (2)  0 (0) | p=0.10, =7.30 |
| Hypertension |  |  |  |
| None  Hypertension | 75 (47)  25 (16) | 73 (8)  27 (3) | p=1.00, =0.02 |
| Tricyclic anti-depressants |  |  |  |
| No  Yes | 100 (63)  0 (0) | 100 (11)  0 (0) | p=1.00, OR = 0 |
| Tricyclic anti-depressants plus anti-psychotics combinations |  |  |  |
| No  Yes | 100 (63)  0 (0) | 100 (11)  0 (0) | p=1.00, OR = 0 |
