# Supplementary material for: Perturbed Inflammatory, Proliferation, Regulatory, And Neurodegeneration Signaling Pathways Are Associated With Trait Anxiety In Cancer Survivors
Source: Research Square preprint supplement (doi:10.21203/rs.3.rs-9383360/v1), 2026-07-17
Supplement: Supplementary file 7 [file f8fee6e0185fbbff3282f209.xlsx]

## Sheet: pe.de.All-cancer1
pathID	pathNames	totalAcc	totalPert	totalAccNorm	totalPertNorm	pPert	pAcc	pComb	pPert.fdr	pAcc.fdr	pComb.fdr
path:hsa04060	Cytokine-cytokine receptor interaction	11.6677	44.6599	7.70341	11.2157	0.00049975	0.0009995	7.74708e-06	0.00734633	0.0352324	0.000417408
path:hsa04080	Neuroactive ligand-receptor interaction	0.161524	22.4522	0.140483	7.14399	0.00049975	0.869565	0.00379861	0.00734633	0.945312	0.0130635
path:hsa04151	PI3K-Akt signaling pathway	27.7103	55.9108	4.39203	5.45851	0.00049975	0.00249875	1.82235e-05	0.00734633	0.0440405	0.000428252
path:hsa04512	ECM-receptor interaction	3.08825	18.9236	2.88783	7.68384	0.00049975	0.0154923	9.88595e-05	0.00734633	0.107375	0.00130482
path:hsa05120	Epithelial cell signaling in Helicobacter pylori infection	9.08698	20.8211	6.77534	7.24003	0.00049975	0.00049975	4.04665e-06	0.00734633	0.0352324	0.000417408
path:hsa05144	Malaria	0.142081	18.2939	-0.0202117	12.6213	0.00049975	0.983008	0.00423393	0.00734633	0.992043	0.0142139
path:hsa05200	Pathways in cancer	37.3987	80.1507	5.15458	6.80736	0.00049975	0.001999	1.48017e-05	0.00734633	0.0402656	0.000417408
path:hsa05203	Viral carcinogenesis	0.199	28.9417	-0.320977	4.52582	0.00049975	0.709645	0.00317209	0.00734633	0.928104	0.0115687
path:hsa05322	Systemic lupus erythematosus	1.09571	24.9279	0.297481	9.32619	0.00049975	0.716642	0.00319985	0.00734633	0.928104	0.0115687
path:hsa05323	Rheumatoid arthritis	0.587622	17.6093	0.759088	7.36905	0.00049975	0.358821	0.0017262	0.00734633	0.665401	0.0080764
path:hsa04010	MAPK signaling pathway	18.8244	51.1913	5.58912	6.96551	0.0009995	0.001999	2.82185e-05	0.00918291	0.0402656	0.000568401
path:hsa04012	ErbB signaling pathway	31.1013	44.7251	8.329	8.79428	0.0009995	0.0009995	1.48017e-05	0.00918291	0.0352324	0.000417408
path:hsa04672	Intestinal immune network for IgA production	0.155942	9.12992	-0.862778	6.39888	0.0009995	0.322339	0.00291262	0.00918291	0.629357	0.0114078
path:hsa04912	GnRH signaling pathway	33.4222	44.5	7.07117	7.3555	0.0009995	0.0009995	1.48017e-05	0.00918291	0.0352324	0.000417408
path:hsa05012	Parkinson's disease	3.44665	32.3869	1.40706	5.29025	0.0009995	0.071964	0.00075811	0.00918291	0.20708	0.0048588
path:hsa05146	Amoebiasis	2.19282	16.0069	1.44923	5.50175	0.0009995	0.081959	0.00085275	0.00918291	0.2263	0.00522773
path:hsa04062	Chemokine signaling pathway	26.9188	44.4808	4.20214	4.88019	0.00149925	0.003998	7.80704e-05	0.0110195	0.0512471	0.0012231
path:hsa04110	Cell cycle	25.9039	50.5972	3.24327	5.21161	0.00149925	0.0089955	0.000164722	0.0110195	0.0836769	0.00165898
path:hsa05010	Alzheimer's disease	3.12831	28.5908	1.32812	4.52044	0.00149925	0.123438	0.00177566	0.0110195	0.280723	0.0080764
path:hsa05132	Salmonella infection	3.65714	15.9289	1.8941	5.04481	0.00149925	0.0449775	0.000715081	0.0110195	0.16689	0.00480126
path:hsa04260	Cardiac muscle contraction	0	10.7711	NA	4.2835	0.001999	NA	NA	0.0127762	NA	NA
path:hsa04510	Focal adhesion	24.4082	42.7286	4.89792	5.63177	0.001999	0.003998	0.000101795	0.0127762	0.0512471	0.00130482
path:hsa05166	HTLV-I infection	26.3668	58.1458	3.96634	5.29572	0.001999	0.00549725	0.000136468	0.0127762	0.059624	0.0016034
path:hsa04115	p53 signaling pathway	4.08598	18.1885	2.395	5.26635	0.00249875	0.0254873	0.000678994	0.0146927	0.123921	0.00480126
path:hsa04144	Endocytosis	0	24.9522	NA	3.60552	0.00249875	NA	NA	0.0146927	NA	NA
path:hsa05140	Leishmaniasis	2.06965	15.0942	0.0162496	4.13916	0.0029985	0.985007	0.0201572	0.0151993	0.992043	0.0424204
path:hsa05143	African trypanosomiasis	1.58505	10.3994	1.67502	6.03369	0.0029985	0.0494753	0.00145621	0.0151993	0.1744	0.00760464
path:hsa05202	Transcriptional misregulation in cancer	0.166965	18.0363	-0.0707319	3.68843	0.0029985	0.938031	0.0193333	0.0151993	0.989662	0.0424204
path:hsa05215	Prostate cancer	24.5651	32.5307	5.17879	4.61571	0.0029985	0.001999	7.80704e-05	0.0151993	0.0402656	0.0012231
path:hsa04810	Regulation of actin cytoskeleton	19.6814	37.9648	3.44657	4.37222	0.00349825	0.00949525	0.000375763	0.0160701	0.0836769	0.00331141
path:hsa05016	Huntington's disease	0.555185	25.3363	0.284473	3.5395	0.00349825	0.703648	0.0172479	0.0160701	0.928104	0.0392251
path:hsa05142	Chagas disease (American trypanosomiasis)	8.02704	25.727	1.57835	4.32573	0.00349825	0.0654673	0.0021486	0.0160701	0.196402	0.00946729
path:hsa04150	mTOR signaling pathway	10.3863	18.5656	4.67466	4.3235	0.003998	0.00449775	0.000214456	0.0172855	0.0528486	0.00201589
path:hsa04740	Olfactory transduction	9.54028	15.6529	5.57851	5.32467	0.003998	0.0029985	0.000147831	0.0172855	0.0469765	0.0016034
path:hsa04360	Axon guidance	11.2795	24.9179	2.90117	4.24868	0.00449775	0.0144928	0.000693454	0.0188906	0.107375	0.00480126
path:hsa04114	Oocyte meiosis	15.5903	31.714	2.42493	3.7011	0.0049975	0.0254873	0.0012697	0.0198549	0.123921	0.0071039
path:hsa04380	Osteoclast differentiation	10.9737	27.2812	2.89058	4.43201	0.0049975	0.0129935	0.000691047	0.0198549	0.101782	0.00480126
path:hsa04390	Hippo signaling pathway	15.3731	32.514	2.3489	3.78804	0.00549725	0.023988	0.00130994	0.0202024	0.123921	0.0071039
path:hsa04914	Progesterone-mediated oocyte maturation	10.1487	27.5207	2.43141	4.39422	0.00549725	0.0329835	0.00174342	0.0202024	0.149738	0.0080764
path:hsa05330	Allograft rejection	0.08826	4.76313	-0.560593	3.54481	0.00549725	0.51924	0.019578	0.0202024	0.822617	0.0424204
path:hsa04950	Maturity onset diabetes of the young	5.10192	7.82138	3.46412	3.86612	0.0069965	0.00949525	0.000705478	0.0244878	0.0836769	0.00480126
path:hsa05210	Colorectal cancer	4.74124	14.0832	3.10544	3.42079	0.0069965	0.0129935	0.000936877	0.0244878	0.101782	0.00550415
path:hsa05133	Pertussis	3.65847	17.3645	0.0348032	3.37512	0.00749625	0.973013	0.0431854	0.0256267	0.992043	0.0791405
path:hsa05310	Asthma	0.0119675	3.81971	-0.522616	3.80337	0.00849575	0.492254	0.027087	0.0283835	0.797791	0.0537926
path:hsa05332	Graft-versus-host disease	0.0762925	5.17672	-0.40393	3.26003	0.0089955	0.609695	0.0340359	0.0293853	0.886984	0.0663928
path:hsa04020	Calcium signaling pathway	5.13007	16.1799	2.8959	3.19302	0.00949525	0.0169915	0.00157015	0.0296979	0.1089	0.00790682
path:hsa05034	Alcoholism	7.50984	27.9968	0.884335	3.55854	0.00949525	0.256872	0.0171128	0.0296979	0.517413	0.0392251
path:hsa05152	Tuberculosis	16.3752	32.4109	2.46052	3.30584	0.009995	0.0249875	0.00232144	0.029985	0.123921	0.00991888
path:hsa05161	Hepatitis B	16.366	33.8974	1.53653	2.92288	0.009995	0.101449	0.00800427	0.029985	0.255435	0.0235125
path:hsa05134	Legionellosis	2.5643	12.4855	0.883029	3.38259	0.0104948	0.206397	0.0154546	0.0302496	0.440939	0.0375708
path:hsa05150	Staphylococcus aureus infection	4.07292	13.0812	1.53267	3.62513	0.0104948	0.075962	0.00648477	0.0302496	0.214213	0.0203189
path:hsa04145	Phagosome	0	16.6656	NA	2.6909	0.0109945	NA	NA	0.0304942	NA	NA
path:hsa04940	Type I diabetes mellitus	0.0762925	4.68393	-0.404102	2.98625	0.0109945	0.628686	0.0412961	0.0304942	0.900153	0.0776368
path:hsa05164	Influenza A	5.35617	25.3366	0.229469	2.90517	0.011994	0.801599	0.0542683	0.0314843	0.945312	0.0948848
path:hsa05410	Hypertrophic cardiomyopathy (HCM)	0	8.47797	NA	2.91168	0.011994	NA	NA	0.0314843	NA	NA
path:hsa05414	Dilated cardiomyopathy	0.497644	9.33137	0.326107	2.89855	0.011994	0.710145	0.0491087	0.0314843	0.928104	0.0876497
path:hsa05412	Arrhythmogenic right ventricular cardiomyopathy (ARVC)	0.814286	7.88974	2.26838	2.81155	0.0124938	0.033983	0.00372116	0.0322207	0.149738	0.0130635
path:hsa04916	Melanogenesis	19.1185	27.124	2.59818	2.83853	0.013993	0.0194903	0.00251101	0.035465	0.119484	0.0104133
path:hsa04620	Toll-like receptor signaling pathway	8.39661	20.4268	1.49978	2.98711	0.0144928	0.085957	0.00957737	0.0361091	0.227053	0.0275594
path:hsa05168	Herpes simplex infection	5.18243	25.2802	0.451667	2.62521	0.0154923	0.63918	0.0556015	0.0367316	0.900153	0.0956075
path:hsa05320	Autoimmune thyroid disease	0.08826	3.66084	-0.538147	2.64004	0.0154923	0.535732	0.048068	0.0367316	0.838608	0.0868922
path:hsa05416	Viral myocarditis	3.06468	10.2642	1.30591	2.91192	0.0154923	0.0834583	0.00989218	0.0367316	0.2263	0.027896
path:hsa05030	Cocaine addiction	4.19413	8.40945	2.70224	2.95108	0.015992	0.021989	0.00314826	0.0373147	0.123921	0.0115687
path:hsa04742	Taste transduction	3.14272	5.82704	2.83736	2.72513	0.017991	0.015992	0.00263359	0.0413231	0.107375	0.0106096
path:hsa04612	Antigen processing and presentation	2.38628	10.2828	2.1027	2.67487	0.0184908	0.035982	0.0055324	0.0418176	0.153741	0.0177288
path:hsa04630	Jak-STAT signaling pathway	1.77668	12.7124	0.331054	2.60332	0.0189905	0.722139	0.0725371	0.042297	0.928104	0.120326
path:hsa03460	Fanconi anemia pathway	2.41337	11.5132	1.45582	2.60803	0.0204898	0.0674663	0.0104838	0.044294	0.198182	0.0284273
path:hsa05217	Basal cell carcinoma	8.32472	14.5871	2.0849	3.02866	0.0204898	0.0444778	0.00729125	0.044294	0.16689	0.0223493
path:hsa04530	Tight junction	5.72554	16.2812	2.56423	2.55285	0.0209895	0.0254873	0.00456502	0.0447168	0.123921	0.014969
path:hsa04064	NF-kappa B signaling pathway	6.32717	17.1505	1.24486	2.64779	0.0214893	0.112444	0.016976	0.0448942	0.264243	0.0392251
path:hsa04310	Wnt signaling pathway	1.11808	15.127	-0.969486	2.37874	0.021989	0.252374	0.0343736	0.0448942	0.51572	0.0663928
path:hsa04723	Retrograde endocannabinoid signaling	1.74322	8.09127	1.67758	2.44554	0.021989	0.0624688	0.0104262	0.0448942	0.19148	0.0284273
path:hsa04621	NOD-like receptor signaling pathway	2.19486	11.8895	0.182473	2.42913	0.023988	0.85907	0.100607	0.0483046	0.945312	0.159389
path:hsa04610	Complement and coagulation cascades	6.32744	13.5217	1.23723	2.45236	0.0284858	0.121939	0.0231427	0.0558321	0.280723	0.0466159
path:hsa04978	Mineral absorption	0.00468769	5.92068	-0.626291	2.24622	0.0284858	0.33933	0.0545083	0.0558321	0.646562	0.0948848
path:hsa04725	Cholinergic synapse	9.80154	17.6942	2.29883	2.38437	0.0304848	0.0309845	0.00752319	0.0589639	0.145627	0.0225696
path:hsa04713	Circadian entrainment	5.72639	11.5835	1.71253	2.05572	0.0344828	0.0549725	0.0137777	0.0658307	0.177763	0.035975
path:hsa04972	Pancreatic secretion	0.139168	6.70598	0.0166519	2.10882	0.0364818	0.984508	0.155395	0.0662961	0.992043	0.225884
path:hsa05160	Hepatitis C	8.883	19.8081	1.66226	2.03744	0.0364818	0.0544728	0.01435	0.0662961	0.177763	0.0359849
path:hsa03320	PPAR signaling pathway	0.403881	6.73904	-0.147516	2.02389	0.0369815	0.863068	0.141861	0.0662961	0.945312	0.212791
path:hsa05014	Amyotrophic lateral sclerosis (ALS)	5.78026	10.839	1.8937	2.11637	0.0369815	0.0434783	0.0119512	0.0662961	0.16689	0.0317947
path:hsa05100	Bacterial invasion of epithelial cells	6.77683	15.3348	1.25293	2.02881	0.0369815	0.0929535	0.0229388	0.0662961	0.238299	0.0466159
path:hsa04540	Gap junction	9.38211	16.1975	1.82065	2.11497	0.037981	0.0529735	0.0145037	0.0672676	0.177763	0.0359849
path:hsa04720	Long-term potentiation	14.9326	20.6077	1.95857	2.07593	0.0429785	0.0469765	0.0145471	0.0752124	0.169838	0.0359849
path:hsa04724	Glutamatergic synapse	4.20303	11.8528	1.64007	1.9136	0.0454773	0.0554723	0.0176147	0.0786489	0.177763	0.0394234
path:hsa04920	Adipocytokine signaling pathway	5.32001	10.32	1.57369	1.74782	0.0484758	0.05997	0.0198863	0.0828597	0.187906	0.0424204
path:hsa04340	Hedgehog signaling pathway	1.86569	5.99033	0.777696	1.8938	0.0514743	0.395302	0.0995984	0.0866701	0.69672	0.159389
path:hsa04210	Apoptosis	8.06415	16.097	1.83492	1.84072	0.051974	0.0444778	0.0163431	0.0866701	0.16689	0.0390573
path:hsa04660	T cell receptor signaling pathway	4.75391	17.3083	0.417265	1.77685	0.0524738	0.651174	0.14954	0.0866701	0.900153	0.221949
path:hsa05145	Toxoplasmosis	7.36828	18.4864	1.01895	1.75367	0.0549725	0.236382	0.0694326	0.0897884	0.49746	0.116548
path:hsa05020	Prion diseases	1.61917	5.6628	0.583329	1.76379	0.055972	0.501749	0.128415	0.0904163	0.803939	0.201184
path:hsa05216	Thyroid cancer	3.37766	7.57331	1.1634	1.7938	0.0584708	0.112444	0.0396093	0.0934261	0.264243	0.0754718
path:hsa04622	RIG-I-like receptor signaling pathway	1.37319	8.77197	-0.634292	1.72687	0.0614693	0.47976	0.133406	0.0971611	0.79068	0.204459
path:hsa05222	Small cell lung cancer	6.9931	15.7906	0.97893	1.56999	0.0704648	0.245377	0.0874482	0.110195	0.508797	0.141726
path:hsa04650	Natural killer cell mediated cytotoxicity	10.2764	21.6791	0.82565	1.62443	0.07996	0.368816	0.133406	0.123728	0.665401	0.204459
path:hsa04930	Type II diabetes mellitus	1.52458	5.57467	0.51835	1.40877	0.0814593	0.577211	0.190766	0.124665	0.866567	0.268981
path:hsa04330	Notch signaling pathway	3.27984	7.40852	1.13255	1.46646	0.0834583	0.170915	0.0748872	0.124665	0.370753	0.12278
path:hsa04728	Dopaminergic synapse	7.61924	15.5346	2.08158	1.56499	0.083958	0.0404798	0.0227176	0.124665	0.16689	0.0466159
path:hsa05130	Pathogenic Escherichia coli infection	4.63177	9.48392	1.43976	1.53453	0.083958	0.0869565	0.0432186	0.124665	0.227053	0.0791405
path:hsa05031	Amphetamine addiction	2.14842	8.23791	0.230837	1.41961	0.0994503	0.824088	0.286974	0.146192	0.945312	0.38173
path:hsa04722	Neurotrophin signaling pathway	9.95943	20.5246	0.818897	1.43886	0.102449	0.371814	0.162567	0.149109	0.665401	0.233897
path:hsa04141	Protein processing in endoplasmic reticulum	2.75713	27.9379	-0.184532	1.54995	0.105947	0.845577	0.305718	0.152688	0.945312	0.399877
path:hsa04970	Salivary secretion	0.864084	5.86825	0.552512	1.5611	0.108946	0.541229	0.225882	0.155485	0.838608	0.315341
path:hsa04666	Fc gamma R-mediated phagocytosis	5.55103	13.988	0.51485	1.3262	0.117941	0.555722	0.244149	0.166705	0.851705	0.334224
path:hsa04350	TGF-beta signaling pathway	4.28757	9.31302	1.36534	1.35998	0.12044	0.105947	0.068413	0.168616	0.258776	0.11622
path:hsa04976	Bile secretion	0.482047	4.84819	0.281299	1.36447	0.122939	0.730635	0.306289	0.17049	0.928104	0.399877
path:hsa04726	Serotonergic synapse	4.21185	14.1932	0.0724226	1.18617	0.14093	0.934533	0.398693	0.193613	0.989662	0.501926
path:hsa04664	Fc epsilon RI signaling pathway	7.19737	12.8138	0.896994	1.19878	0.148426	0.288856	0.177904	0.202024	0.573643	0.253378
path:hsa04370	VEGF signaling pathway	6.97924	13.4951	0.794374	1.19023	0.161419	0.372814	0.229309	0.217694	0.665401	0.316986
path:hsa05211	Renal cell carcinoma	2.3665	10.043	0.123922	1.23752	0.169915	0.881059	0.434009	0.225023	0.948316	0.5368
path:hsa05219	Bladder cancer	2.93113	8.06116	0.176315	1.0405	0.169915	0.850575	0.424081	0.225023	0.945312	0.529163
path:hsa04670	Leukocyte transendothelial migration	6.62678	14.979	0.694012	1.13335	0.172414	0.428286	0.266263	0.226293	0.72757	0.357553
path:hsa05162	Measles	4.87196	15.1972	0.461346	1.13605	0.202899	0.610195	0.382445	0.262921	0.886984	0.485809
path:hsa04971	Gastric acid secretion	1.21852	5.65973	0.867938	1.12396	0.203898	0.325837	0.246582	0.262921	0.629357	0.334309
path:hsa04727	GABAergic synapse	1.74296	5.76662	1.09664	1.09548	0.21939	0.16092	0.153353	0.280438	0.354526	0.225237
path:hsa04066	HIF-1 signaling pathway	6.30194	13.9796	0.598723	0.871658	0.263868	0.456772	0.375549	0.334385	0.766724	0.481385
path:hsa04973	Carbohydrate digestion and absorption	0.13076	3.85315	-0.414836	0.937196	0.286357	0.63918	0.49384	0.359782	0.900153	0.600272
path:hsa05032	Morphine addiction	1.64504	7.3384	-0.0031305	0.910787	0.289355	0.9995	0.648005	0.359908	0.9995	0.761406
path:hsa03018	RNA degradation	0.653846	9.48864	0.956439	0.9992	0.291354	0.106447	0.138734	0.359908	0.258776	0.210339
path:hsa04662	B cell receptor signaling pathway	3.80111	12.3104	0.232532	0.816981	0.347826	0.822589	0.644152	0.426087	0.945312	0.761406
path:hsa04960	Aldosterone-regulated sodium reabsorption	0.466246	3.69545	-0.182511	0.748088	0.389805	0.841079	0.693476	0.473565	0.945312	0.789056
path:hsa05169	Epstein-Barr virus infection	3.94917	22.83	-0.528512	0.752356	0.416292	0.577711	0.583216	0.501598	0.866567	0.696894
path:hsa04320	Dorso-ventral axis formation	0.0258026	2.31841	-0.596146	0.681651	0.435782	0.405797	0.483216	0.520813	0.706388	0.592464
path:hsa05110	Vibrio cholerae infection	0.960573	6.07439	0.291909	0.682544	0.43978	0.748626	0.695005	0.521352	0.942466	0.789056
path:hsa05221	Acute myeloid leukemia	2.16626	7.65979	-0.0453903	0.634209	0.462769	0.958021	0.803963	0.544216	0.992043	0.858778
path:hsa04961	Endocrine and other factor-regulated calcium reabsorption	1.34459	4.5562	0.716945	0.647484	0.471764	0.41979	0.518727	0.550391	0.721834	0.625132
path:hsa04140	Regulation of autophagy	0.746832	1.7672	0.155063	-0.585464	0.484258	0.863568	0.782776	0.560519	0.945312	0.849011
path:hsa05131	Shigellosis	1.7077	7.74418	-0.159289	0.616433	0.498251	0.868066	0.795022	0.57221	0.945312	0.855711
path:hsa04721	Synaptic vesicle cycle	0	4.44248	NA	0.636037	0.510745	NA	NA	0.577612	NA	NA
path:hsa04270	Vascular smooth muscle contraction	4.22258	11.4684	0.0816601	0.612914	0.514243	0.94053	0.834978	0.577612	0.989662	0.885202
path:hsa05218	Melanoma	5.71056	10.2609	0.304668	0.5556	0.514743	0.727636	0.742365	0.577612	0.928104	0.822037
path:hsa04744	Phototransduction	1.17742	2.43987	0.463687	0.521094	0.536232	0.586707	0.678433	0.594334	0.870796	0.78409
path:hsa05220	Chronic myeloid leukemia	5.57637	12.1765	0.431796	0.564328	0.537731	0.648176	0.715907	0.594334	0.900153	0.801134
path:hsa03013	RNA transport	0.406452	13.2869	-0.372156	-0.567966	0.56022	0.675662	0.746246	0.61457	0.916042	0.822037
path:hsa05213	Endometrial cancer	4.12552	8.40062	0.414133	0.494894	0.573713	0.672664	0.75336	0.62471	0.916042	0.82344
path:hsa05214	Glioma	3.92447	9.02425	0.146321	0.49288	0.582209	0.868066	0.850285	0.629299	0.945312	0.894702
path:hsa04910	Insulin signaling pathway	10.4276	21.9417	0.0510532	0.507432	0.591704	0.95952	0.88914	0.634894	0.992043	0.915838
path:hsa05212	Pancreatic cancer	4.40644	10.3051	0.159733	0.439839	0.643678	0.871564	0.885281	0.685657	0.945312	0.915838
path:hsa04623	Cytosolic DNA-sensing pathway	0.542651	5.26964	-0.655971	0.363877	0.691154	0.482259	0.699518	0.730933	0.79068	0.789056
path:hsa05223	Non-small cell lung cancer	6.14342	10.6544	0.237629	0.316073	0.72064	0.789605	0.889857	0.756672	0.945312	0.915838
path:hsa04962	Vasopressin-regulated water reabsorption	0.742781	3.53278	0.196949	-0.302072	0.756122	0.82059	0.916605	0.788297	0.945312	0.932893
path:hsa03008	Ribosome biogenesis in eukaryotes	0	5.92406	NA	-0.273932	0.776612	NA	NA	0.803957	NA	NA
path:hsa04122	Sulfur relay system	0.77261	1.57716	0.229271	0.203171	0.801599	0.782109	0.91966	0.824022	0.945312	0.932893
path:hsa04730	Long-term depression	3.0012	7.90316	-0.202312	0.203774	0.813093	0.825087	0.938669	0.830033	0.945312	0.945374
path:hsa03015	mRNA surveillance pathway	0.00889539	8.02332	-0.689607	-0.185383	0.853573	0.365817	0.675696	0.85942	0.665401	0.78409
path:hsa04130	SNARE interactions in vesicular transport	0.100412	2.57033	-1.25271	-0.175519	0.853573	0.138431	0.370518	0.85942	0.309821	0.479294
path:hsa04710	Circadian rhythm	1.17448	3.24274	-0.172038	-0.0750398	0.931534	0.830585	0.972214	0.931534	0.945312	0.972214
path:hsa04514	Cell adhesion molecules (CAMs)	NA	NA	NA	NA	NA	NA	NA	NA	NA	NA
path:hsa04520	Adherens junction	NA	NA	NA	NA	NA	NA	NA	NA	NA	NA
